# Supplementary material
Source: PubMed Central journal article supplement (PMC6530572)
Supplement: NIHMS1029294-supplement-Supplemental_Material_for_Online_Publication.pdf [file NIHMS1029294-supplement-Supplemental_Material_for_Online_Publication.pdf]

Supplementary Table 1

*Sample-Level Moderators of the Meta-Analytic Associations*

|                          | Difference<br>in Partial <i>r</i> | 95% CI       | <i>Q</i> | <i>p</i> |
|--------------------------|-----------------------------------|--------------|----------|----------|
| <b>Neuroticism</b>       |                                   |              |          |          |
| Age 60                   | .040                              | .012, .068   | 7.9      | .005     |
| Location                 | -.012                             | -.047, .024  | .4       | .511     |
| Measure (BFI)            | -.019                             | -.052, .015  | 1.2      | .276     |
| Measure (MIDI)           | -.008                             | -.047, .032  | .1       | .706     |
| <b>Extraversion</b>      |                                   |              |          |          |
| Age 60                   | -.035                             | -.066, -.003 | 4.7      | .030     |
| Location                 | .015                              | -.021, .052  | .7       | .406     |
| Measure (BFI)            | -.027                             | -.066, .011  | 2        | .158     |
| Measure (MIDI)           | .030                              | -.009, .069  | 2.2      | .136     |
| <b>Openness</b>          |                                   |              |          |          |
| Age 60                   | .008                              | -.027, .042  | .2       | .666     |
| Location                 | -.014                             | -.048, .019  | .7       | .404     |
| Measure (BFI)            | .015                              | -.019, .049  | .7       | .394     |
| Measure (MIDI)           | .011                              | -.024, .046  | .4       | .539     |
| <b>Agreeableness</b>     |                                   |              |          |          |
| Age 60                   | -.001                             | -.038, .035  | 0.0      | .940     |
| Location                 | .000                              | -.037, .038  | 1.0      | .980     |
| Measure (BFI)            | .027                              | .001, .052   | 4.2      | .042     |
| Measure (MIDI)           | -.015                             | -.051, .021  | .7       | .413     |
| <b>Conscientiousness</b> |                                   |              |          |          |
| Age 60                   | -.033                             | -.055, -.012 | 9.2      | .002     |
| Location                 | .007                              | -.024, .038  | .2       | .666     |
| Measure (BFI)            | -.005                             | -.038, .027  | .1       | .753     |
| Measure (MIDI)           | -.006                             | -.036, .025  | .1       | .711     |

*Note.* Total *N* for the meta-analysis=86,044. CI=Confidence Interval. Age 60 compared samples with a mean age below 60 (k=4) to a mean age above 60 (k=6). Location compared samples from the United States (k=5) to samples in Europe (k=5). Measure BFI compared samples with the BFI (k=5) to samples that used other personality measures (k=5). Measure MIDI compared samples with the MIDI (k=3) to samples that used other personality measures (k=7).

Supplementary Table 2

*Interactions Between Personality and Demographic Factors on Semantic Fluency*

|                               | US     | HRS    | ELSA  | WLSG <sup>a</sup> | WLSS  | NCDS <sup>a</sup> | CogUSA | SOEP   | MIDUS | CFAS  |
|-------------------------------|--------|--------|-------|-------------------|-------|-------------------|--------|--------|-------|-------|
| <i>Sex interactions</i>       |        |        |       |                   |       |                   |        |        |       |       |
| Neuroticism                   | .01    | -.01   | .00   | -.04              | .01   | .02               | -.07   | -.02   | -.12* | .01   |
| Extraversion                  | .00    | .00    | .01   | -.02              | .01   | .00               | -.01   | .00    | .01   | .01   |
| Openness                      | -.01   | .01    | .01   | .00               | .02   | .02               | .00    | .02    | .07** | .02   |
| Agreeableness                 | .01    | .00    | .01   | .01               | .00   | .02               | .04    | -.02   | -.01  | .00   |
| Conscientiousness             | .01    | .00    | .01   | .03               | .00   | -.02              | .04    | .01    | .02   | .01   |
| <i>Education interactions</i> |        |        |       |                   |       |                   |        |        |       |       |
| Neuroticism                   | .01    | .00    | .01   | .02               | -.01  | .01               | .01    | .00    | .02   | .02   |
| Extraversion                  | -.01   | .01    | -.01  | -.05*             | -.03  | -.03*             | -.01   | -.02   | .01   | -.02  |
| Openness                      | -.02** | .04**  | -.02* | -.04*             | -.02  | -.04**            | -.04   | -.09** | .02   | -.02  |
| Agreeableness                 | -.02** | .00    | -.02* | -.05*             | -.06* | -.02              | -.01   | .00    | .00   | -.03  |
| Conscientiousness             | -.02** | .00    | -.02  | -.01              | -.02  | -.03*             | -.02   | -.08** | -.02  | -.05* |
| <i>Age interactions</i>       |        |        |       |                   |       |                   |        |        |       |       |
| Neuroticism                   | .02**  | .00    | .01   | --                | .02   | --                | .01    | .02    | .03   | -.01  |
| Extraversion                  | .00    | .00    | .00   | --                | .04   | --                | -.01   | -.01   | .00   | -.02  |
| Openness                      | .01**  | -.02** | .01   | --                | .03   | --                | -.03   | .02    | -.03  | .01   |
| Agreeableness                 | -.01** | .00    | .02*  | --                | .02   | --                | -.01   | -.01   | .01   | -.01  |
| Conscientiousness             | .00    | -.01   | .02*  | --                | .01   | --                | -.02   | .00    | .02   | .00   |

*Note.* Total  $N=86,044$ ;  $N=40,076$  for US;  $N=14,851$  for HRS;  $N=8,778$  for ELSA;  $N=2,204$  for WLSG;  $N=1,255$  for WLSS;  $N=7,894$  for NCDS;  $N=1,223$  for CogUSA;  $N=3,998$  for SOEP;  $N=3,626$  for MIDUS;  $N=2,139$  for CFAS. Regression coefficients are interaction term for each trait with the demographic moderator on semantic fluency controlling for the main effect of the trait and demographic factor. For the sex interactions, a positive association means a stronger association among females, and a negative association means a stronger association among males. For education and age, a negative interaction means a stronger association among participants with less education and younger participants, respectively, and a positive association means a stronger association among participants with more education and older participants, respectively. US=Understanding Society. HRS=Health and Retirement Study. ELSA=English Longitudinal Study of Ageing. WLSG=Wisconsin Longitudinal Study Graduate sample. WLSS=Wisconsin

Longitudinal Study Sibling sample. NCDS=National Childhood Development Study. CogUSA=Cognition in the United States. SOEP=Socioeconomic Panel Survey. MIDUS=Midlife in the United States Study. CFAS=Cognitive Function and Ageing Study in Wales. <sup>a</sup> Interaction with age was not computed because participants in the sample were nearly all the same age.
